# Supplementary material
Source: Springer Nature journal article supplement (http://www.springermedizin.de/resource/supplementary/12888_2009_673_MOESM3_ESM.pdf/9478122)

**Time to Hospitalization**

**Time to Incapacitation**

**Time to Onset**

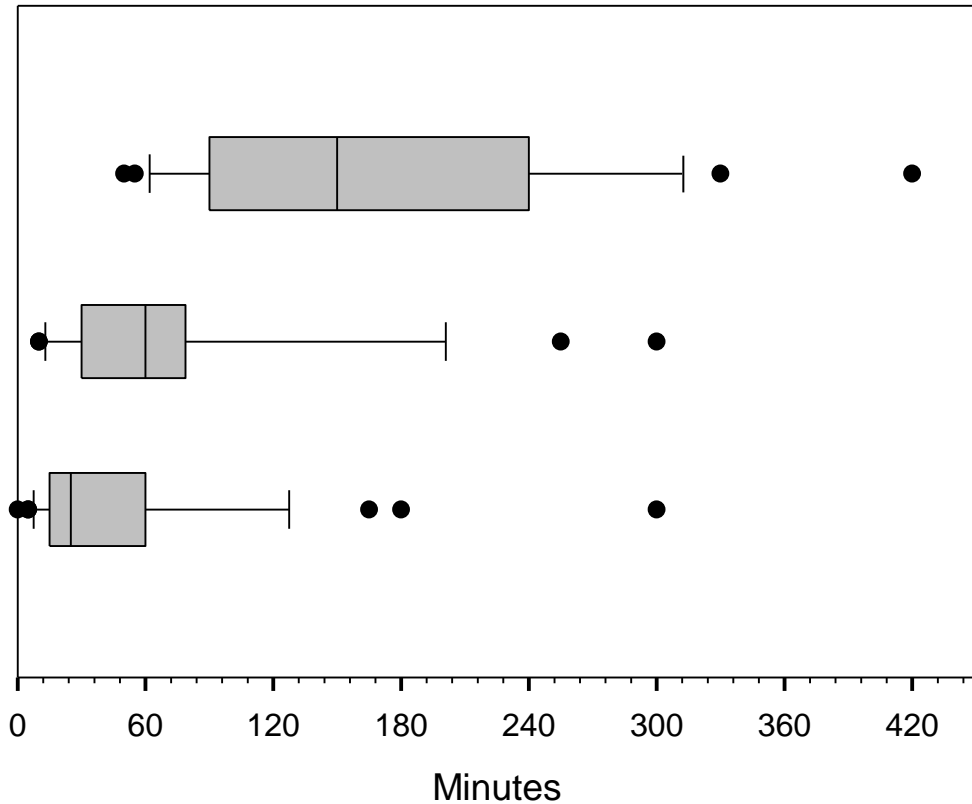

Supplement: MOESM3 [file 9478122]
